# Supplementary material
Source: Springer Nature journal article supplement (https://www.springermedizin.de/resource/supplementary/12889_2014_7414_MOESM1_ESM.pdf/9497192)
Supplement: MOESM1 [file 9497192]

**Wisconsin Assessment of the Social and Built Environment (WASABE)**

|                                                                                                                                                                                                                                  |                                                                                               |                                                                                                                                                                                                                                                                                                                                                                                                                                                                                                                                                                                                                                                                                                                                                     |
|----------------------------------------------------------------------------------------------------------------------------------------------------------------------------------------------------------------------------------|-----------------------------------------------------------------------------------------------|-----------------------------------------------------------------------------------------------------------------------------------------------------------------------------------------------------------------------------------------------------------------------------------------------------------------------------------------------------------------------------------------------------------------------------------------------------------------------------------------------------------------------------------------------------------------------------------------------------------------------------------------------------------------------------------------------------------------------------------------------------|
|  <p align="center"><b>(WASABE)</b><br/><b>Wisconsin Assessment of the Social and Built Environment</b><br/>Survey of the Health Of Wisconsin</p> | <b>Date:</b>                                                                                  | <b>Weather Conditions:</b><br>Temperature (check one):<br>___ very cold (below 20°F)<br>___ cold (20-39°F)<br>___ cool (40-54°F)<br>___ mild (55-69°F)<br>___ warm (70-84°F)<br>___ hot (85-95°F)<br>___ very hot (over 95°F)<br>Temp. (& wind speed if applicable) check one:<br>___ were based on an official source<br>___ were estimated by observer<br>Weather Description (check all that apply):<br>___ sunny to partly cloudy<br>___ mostly cloudy to cloudy<br>___ light to moderate rain<br>___ heavy rain or thunderstorm<br>___ light to moderate snow or freezing rain<br>___ moderate to heavy snow, freezing rain<br>___ heavy fog<br>___ snow on the ground<br>___ ice on the ground<br>___ strong winds (approx. 25 mph or higher) |
|                                                                                                                                                                                                                                  | <b>Day of Week:</b>                                                                           |                                                                                                                                                                                                                                                                                                                                                                                                                                                                                                                                                                                                                                                                                                                                                     |
|                                                                                                                                                                                                                                  | <b>Start Time:</b> <b>Stop Time:</b>                                                          |                                                                                                                                                                                                                                                                                                                                                                                                                                                                                                                                                                                                                                                                                                                                                     |
|                                                                                                                                                                                                                                  | <b>Data Collected by</b> (check all that apply):<br>___ Foot    ___ Auto                      |                                                                                                                                                                                                                                                                                                                                                                                                                                                                                                                                                                                                                                                                                                                                                     |
| <b>Assessor ID:</b>                                                                                                                                                                                                              | <b>Topography:</b> <input type="checkbox"/> <b>Mostly Flat</b>                                |                                                                                                                                                                                                                                                                                                                                                                                                                                                                                                                                                                                                                                                                                                                                                     |
| <b>Initials:</b>                                                                                                                                                                                                                 | <input type="checkbox"/> <b>Moderately Hilly</b> <input type="checkbox"/> <b>Mostly Hilly</b> |                                                                                                                                                                                                                                                                                                                                                                                                                                                                                                                                                                                                                                                                                                                                                     |
| <b>Classification:</b> <input type="checkbox"/> <b>Urban</b> <input type="checkbox"/> <b>Suburban</b> <input type="checkbox"/> <b>Rural</b>                                                                                      |                                                                                               |                                                                                                                                                                                                                                                                                                                                                                                                                                                                                                                                                                                                                                                                                                                                                     |
| <b>Household ID:</b>                                                                                                                                                                                                             | <b>Block Group:</b>                                                                           |                                                                                                                                                                                                                                                                                                                                                                                                                                                                                                                                                                                                                                                                                                                                                     |
| <b>Polygon ID:</b>                                                                                                                                                                                                               |                                                                                               |                                                                                                                                                                                                                                                                                                                                                                                                                                                                                                                                                                                                                                                                                                                                                     |
| <b>Segment ID:</b>                                                                                                                                                                                                               | <b>Segment length:</b><br>(only if it is a street network terminal)                           |                                                                                                                                                                                                                                                                                                                                                                                                                                                                                                                                                                                                                                                                                                                                                     |
| <b>Intersection(s) ID:</b><br>(only if it needs to be observed - use page 4)                                                                                                                                                     |                                                                                               |                                                                                                                                                                                                                                                                                                                                                                                                                                                                                                                                                                                                                                                                                                                                                     |

**1. What types of residential buildings are present in the segment?**

| Residential Buildings                                                 | Yes | No |
|-----------------------------------------------------------------------|-----|----|
| a. Single family homes                                                |     |    |
| b. Multi-unit homes (2-6 units)                                       |     |    |
| c. Apartment building/complex or condominium (>6 units)               |     |    |
| d. Apartment over retail in multi-story building                      |     |    |
| e. Mobile home or trailer<br>(do not count if part of a trailer park) |     |    |
| f. Mobile home or trailer park/community                              |     |    |
| g. Other (Specify):                                                   |     |    |

**2. How many of each type of non-residential building are present in the segment?  
If present, how many are adjacent to the sidewalk (# Adj to SW)?**

| Non-Residential Businesses (1/3)                                                                    | # | # Adj to SW |
|-----------------------------------------------------------------------------------------------------|---|-------------|
| a. Bars/nightclubs                                                                                  |   |             |
| b. Liquor/tobacco stores                                                                            |   |             |
| c. Wine stores                                                                                      |   |             |
| d. Fast food restaurants (i.e., you order and you bring your food to your table)                    |   |             |
| e. Other restaurants (i.e., sit-down restaurants; you order & wait staff brings your food to table) |   |             |
| f. Coffee Shops (e.g., Ancora, Alterra, or local)                                                   |   |             |
| g. Specialty/Ethnic Food Store                                                                      |   |             |
| h. Food supermarkets or grocery stores                                                              |   |             |

| Non-Residential Buildings or Businesses (2/3)                                                                                       | # | # Adj to SW |
|-------------------------------------------------------------------------------------------------------------------------------------|---|-------------|
| i. Convenience stores or gas station stores                                                                                         |   |             |
| j. Gas Station                                                                                                                      |   |             |
| k. Pharmacies, drug stores (primarily non-food; e.g. Walgreens, locally owned pharmacies, etc.)                                     |   |             |
| l. Health care facilities (e.g., hospital, elderly residence, clinic, dentist, acupuncturist, etc.)                                 |   |             |
| m. Retail stores (e.g., video rental, florist, bookstore, clothing, sporting goods, etc.)                                           |   |             |
| n. Indoor malls, super centers, department stores, "big box" stores (e.g., Walmart, Home Depot, etc.)                               |   |             |
| o. Service providers (e.g., hair salon, bank, laundromat, dry cleaners, accountant, car wash, car repair, post office, FedEx, etc.) |   |             |
| p. Indoor Fitness facilities (e.g., gyms, fitness centers, health clubs, yoga, martial arts, or dance studios, etc.)                |   |             |
| q. Cultural entertainment (e.g., movie theaters, museum, library, etc.)                                                             |   |             |
| r. Other entertainment (e.g., bowling alley, karaoke, billiards, etc.)                                                              |   |             |
| s. Non-religious community center (e.g., senior center, neighborhood center, drop-in center, etc.)                                  |   |             |
| t. Church, synagogue, mosque, other religious center                                                                                |   |             |
| u. Educational facilities (e.g., university, tech school, K-12 schools, daycare, ESL facility, etc.)                                |   |             |
| v. Government facilities (e.g. police, courthouse, etc.)                                                                            |   |             |

| Non-Residential Buildings / Businesses<br>(3/3)                      | # | # Adj<br>to SW |
|----------------------------------------------------------------------|---|----------------|
| w. Transportation facilities (e.g. train or bus station)             |   |                |
| x. Hotels, motels, inns, etc.                                        |   |                |
| y. Office space                                                      |   |                |
| z. Warehouse, storage facilities, factory, industrial building, etc. |   |                |
| aa. Farm Complexes (Barn, silo, rural storage facility, etc.)        |   |                |
| bb. Other non-residential (Specify type):<br>_____                   |   |                |

**Addendum: Building size:**  
 Tallest building in the segment.  Res.  Non-Res.  Mixed Use  
 How many stories tall is (are) the tallest building(s)? \_\_\_\_\_

3. What types of recreational facilities are visible in the segment?

| Recreational Facilities                                                                                              | Yes | No |
|----------------------------------------------------------------------------------------------------------------------|-----|----|
| a. Indoor fitness facilities (e.g., gyms, fitness centers, health clubs, yoga, martial arts, or dance studios, etc.) |     |    |
| b. Sports/playing field, courts, or track                                                                            |     |    |
| c. Playground or splash pad                                                                                          |     |    |
| d. Golf course                                                                                                       |     |    |
| e. Pool (indoor or outdoor)                                                                                          |     |    |
| f. Off-road walking/biking trail or path                                                                             |     |    |
| i. On one side of the road                                                                                           |     |    |
| ii. On both sides of the road                                                                                        |     |    |
| iii. Crossing the road                                                                                               |     |    |
| g. Other Recreational Facilities (Specify Type):<br>_____                                                            |     |    |

4. What is the predominant land use? Check one or two that apply.

| Predominant Land Use                    | Check<br>1 or 2 |
|-----------------------------------------|-----------------|
| a. Residential buildings/yards          |                 |
| b. Commercial buildings / businesses    |                 |
| c. Public government buildings          |                 |
| d. Manufacturing                        |                 |
| e. School/school yards                  |                 |
| f. Parking lots or garages              |                 |
| g. Park or designated green space       |                 |
| h. Abandoned buildings                  |                 |
| i. Undeveloped land/farmlands/woodlands |                 |
| j. Other (Specify):<br>_____            |                 |

5. Evaluate the traffic volume and type.

| Traffic Volume                                                                                                                                                                                                                                                                                                                                                                                             |
|------------------------------------------------------------------------------------------------------------------------------------------------------------------------------------------------------------------------------------------------------------------------------------------------------------------------------------------------------------------------------------------------------------|
| a. What is the speed limit in the segment?<br>Enter MPH: _____ check if unknown: <input type="checkbox"/>                                                                                                                                                                                                                                                                                                  |
| b. Scan the entire segment and count any cars, trucks, and other motorized vehicles driving within the segment during 2 minutes. Check the appropriate box for number of vehicles.<br><input type="checkbox"/> 0 <input type="checkbox"/> 1-4 <input type="checkbox"/> 5-15 <input type="checkbox"/> 16-34 <input type="checkbox"/> 35+<br>check if NA: <input type="checkbox"/> If NA, give reason: _____ |
| c. Bus or other public transportation present<br>Yes <input type="checkbox"/> No <input type="checkbox"/>                                                                                                                                                                                                                                                                                                  |

6. On what type of street is the segment? Check **ONE** best description.

| Check 1                  | Street Type                                                                                       |
|--------------------------|---------------------------------------------------------------------------------------------------|
| <input type="checkbox"/> | Pedestrian only / Closed to motorized traffic                                                     |
| <input type="checkbox"/> | Pedestrian with limited access to certain motorized vehicles (e.g., buses, delivery trucks, etc.) |
| <input type="checkbox"/> | Dead end street (either one way or two way)                                                       |
| <input type="checkbox"/> | One way street                                                                                    |
| <input type="checkbox"/> | Two way street                                                                                    |
| <input type="checkbox"/> | Other (Specify): _____                                                                            |

7. Describe the following **STREET** characteristics **in the segment ONLY** (not including intersections)

| Street Characteristics                                                                           | Enter #   |
|--------------------------------------------------------------------------------------------------|-----------|
| a. Traffic lanes (within the segment)                                                            |           |
| b. How many pedestrian crosswalks are present? (within the segment)                              |           |
| i. How many pedestrian crosswalks have missing pieces or sections worn off? (within the segment) |           |
| c. Walk/Don't Walk signals (within the segment)                                                  |           |
| d. Ramps or Curb Cuts (within the segment)                                                       |           |
|                                                                                                  | Yes    No |
| e. Pedestrian safety signs and devices (within the segment)                                      |           |
| f. Medians or pedestrian islands (within the segment)                                            |           |
| i. Pedestrian Pushbutton on Median                                                               |           |
| g. Traffic calming devices (within the segment)                                                  |           |
| h. On-street parking available (within the segment)                                              |           |
| i. With Bulb-Out                                                                                 |           |
| ii. Without Bulb-Out                                                                             |           |
| i. Railroad (within the segment)                                                                 |           |

8. Please answer the following questions regarding **bicycling** conditions and follow the skip patterns

| Bicycle Transportation/Commuting                                                                                                                                                          |                 |               |    |
|-------------------------------------------------------------------------------------------------------------------------------------------------------------------------------------------|-----------------|---------------|----|
| On-Road Biking Conditions                                                                                                                                                                 | Yes, both sides | Yes, one side | No |
| a. Is there an on-street, paved, marked bike lane?                                                                                                                                        |                 |               |    |
| i. If <b>Yes [for Q.8(a.)]:</b><br>Are there any obstructions in the marked bike lane (e.g., drainage gates, parked cars, etc.)? <b>Continue on to Q.8(a.)(ii.)</b>                       |                 |               |    |
| ii. If <b>Yes [for Q.8(a.)]:</b><br>Are there any parts of the bike lanes that are missing or worn off? <b>If Yes: Skip to Q.9</b>                                                        |                 |               |    |
| iii. If <b>No [for Q.8(a.)]:</b><br>Is the outermost lane wide enough (~15 ft.) that it would reasonably fit a motorized vehicle and a cyclist side by side?<br><b>If No: Skip to Q.9</b> |                 |               |    |
| iv. If <b>Yes [for Q.8(a.)(iii.)]:</b><br>Are there obstructions in the outermost part of the lane (e.g., drainage gates, parked cars, etc.)?                                             |                 |               |    |

9. Are sidewalks present in the segment?  
Choose **one** description below that is the best fit.

| Sidewalk Analysis                                                                       |           |           |    |
|-----------------------------------------------------------------------------------------|-----------|-----------|----|
| <input type="checkbox"/> Sidewalk is present in the entire segment                      |           |           |    |
| <input type="checkbox"/> Sidewalk is present, but missing some parts in the segment     |           |           |    |
| <input type="checkbox"/> Sidewalk is completely or mostly missing <b>(Skip to Q.10)</b> |           |           |    |
| Sidewalk Features                                                                       | Yes > 1/2 | Yes ≤ 1/2 | No |
| a. Grassy or other buffer area between street/curb and sidewalk                         |           |           |    |
| b. Major misalignments or cracks in the sidewalk                                        |           |           |    |

10. Does the street segment have the following characteristics?

| Neighborhood Characteristics (1/2)                                                  | Yes > 1/2 | Yes ≤ 1/2 | No | NA |
|-------------------------------------------------------------------------------------|-----------|-----------|----|----|
| a. Do the buildings have a variety of building materials and/or a variety of color? |           |           |    |    |
| b. Are there buildings in poor condition?                                           |           |           |    |    |
| c. Is there vegetation (not including shade trees)?                                 |           |           |    |    |
| i. Is the vegetation neglected / unkempt?                                           |           |           |    |    |
|                                                                                     | 0         | 1-5       | 6+ |    |
| d. Are there medium/large shade trees within the segment?                           |           |           |    |    |
| e. Are there street lights over or near sidewalks or paths?                         |           |           |    |    |

| Neighborhood Characteristics (2/2) | 0 | 1-2 | 3+ | NA |
|------------------------------------|---|-----|----|----|
| f. Litter                          |   |     |    |    |
| i. Careless/Harmless               |   |     |    |    |
| ii. Hazardous                      |   |     |    |    |
| iii. Cigarette Butts* (see manual) |   |     |    |    |
| g. Broken/boarded up windows       |   |     |    |    |

11. Are any of the following publicly available amenities present within the segment?

| Publicly Available Amenities                                                                                   | Yes | No |
|----------------------------------------------------------------------------------------------------------------|-----|----|
| a. Public trash cans (nonresidential)                                                                          |     |    |
| b. Seating/benches                                                                                             |     |    |
| c. Bike rack                                                                                                   |     |    |
| d. Public art (e.g., murals, sculptures, urban furniture, neighborhood kiosks, public fountain, etc.)          |     |    |
| e. Public attractive natural features (e.g., notable public landscaping, gardens, parks or green spaces, pond) |     |    |

12. Are the following signs visible in the segment?

| Neighborhood Signs                                                                                                                                                             | 0 | 1-2 sm | 1+ lg or 3+ sm |
|--------------------------------------------------------------------------------------------------------------------------------------------------------------------------------|---|--------|----------------|
| a. Neighborhood/social/cultural message or event                                                                                                                               |   |        |                |
| b. Political message or event                                                                                                                                                  |   |        |                |
| c. Religious message or event                                                                                                                                                  |   |        |                |
| d. Fast food ads (e.g., billboards, signs outside restaurants—other than logo/name only, etc.)                                                                                 |   |        |                |
| e. Alcohol ads (e.g., billboards, special offer ads, neon signs, etc.)                                                                                                         |   |        |                |
| f. Tobacco ads (e.g., special offer ads, signs outside stores, etc.)                                                                                                           |   |        |                |
| g. Security warning sign or message that suggests crime or risk of crime in the area (e.g., abduction flier, neighborhood watch, no trespassing sign, no loitering sign, etc.) |   |        |                |
| h. Graffiti (See Manual)                                                                                                                                                       |   |        |                |

13. Are people engaging in the following activities visible within the segment?  
If yes, specify if more or less than 5 people.

| Activities                                                                                                 | Yes 1-5 | Yes 6+ | No |
|------------------------------------------------------------------------------------------------------------|---------|--------|----|
| a. Walking                                                                                                 |         |        |    |
| b. Biking                                                                                                  |         |        |    |
| c. Engaging in other physical activities (e.g., jogging, playing a sport, etc.); Specify activities: _____ |         |        |    |
| d. People loitering, acting hostile, threatening                                                           |         |        |    |
| e. Homeless people or panhandlers                                                                          |         |        |    |
| f. Aggressive, uncontrolled dogs or stray animals.                                                         |         |        |    |

**INTERSECTIONS Analysis**  
**Conducted independently from segments**

**Intersection #** \_\_\_\_\_ **Polygon** \_\_\_\_\_  
 (connect segments # \_\_\_\_\_, \_\_\_\_\_, \_\_\_\_\_, \_\_\_\_\_)

14. Describe the following **INTERSECTION** characteristics:

| Intersection Characteristics                                                                                                                                                                                                                                                         | Enter # |    |
|--------------------------------------------------------------------------------------------------------------------------------------------------------------------------------------------------------------------------------------------------------------------------------------|---------|----|
|                                                                                                                                                                                                                                                                                      | Yes     | No |
| a. Traffic Lanes<br>(including turning lanes)                                                                                                                                                                                                                                        |         |    |
| b. Pedestrian crosswalks<br>(If 1+, see scenarios in the manual)<br><input type="checkbox"/> A <input type="checkbox"/> B <input type="checkbox"/> C <input type="checkbox"/> D <input type="checkbox"/> E <input type="checkbox"/> F                                                |         |    |
| i. How many pedestrian crosswalks have missing pieces or sections worn off? (within the segment)                                                                                                                                                                                     |         |    |
| c. Walk/Don't Walk signals<br>(See manual)                                                                                                                                                                                                                                           |         |    |
| d. Ramps or curb cuts<br>(See Manual)                                                                                                                                                                                                                                                |         |    |
|                                                                                                                                                                                                                                                                                      | Yes     | No |
| e. Pedestrian safety signs and devices                                                                                                                                                                                                                                               |         |    |
| f. Medians or pedestrian islands                                                                                                                                                                                                                                                     |         |    |
| i. Pedestrian Pushbutton on Median                                                                                                                                                                                                                                                   |         |    |
| g. Traffic calming devices                                                                                                                                                                                                                                                           |         |    |
| <b>Traffic Volume within the Intersection</b>                                                                                                                                                                                                                                        |         |    |
| h. How many cars, trucks, and other motorized vehicles travel through the intersection (in any direction) during 2 minutes?<br><br><input type="checkbox"/> 0 <input type="checkbox"/> 1-4 <input type="checkbox"/> 5-15 <input type="checkbox"/> 16-34 <input type="checkbox"/> 35+ |         |    |
| check if NA: <input type="checkbox"/> If NA, give reason: _____                                                                                                                                                                                                                      |         |    |

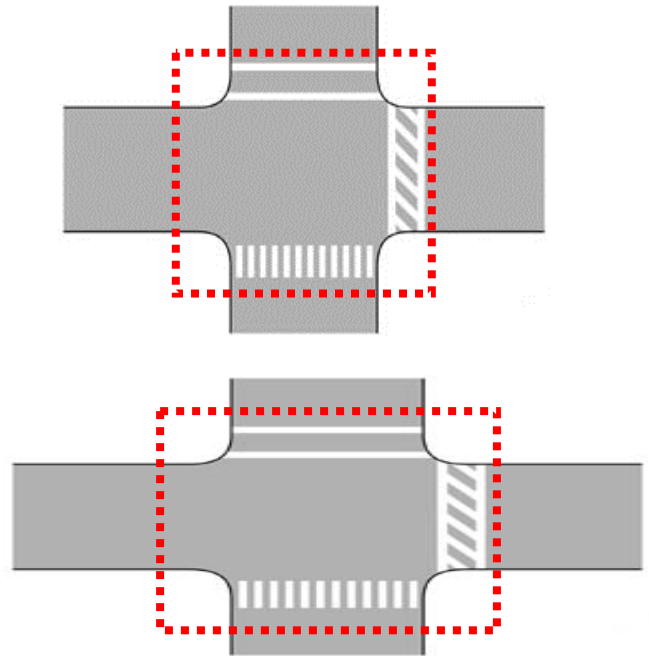

Please use the below space for additional comments:

---
